# Supplementary material for: Ex vivo efficacy of BCMA‐bispecific antibody TNB‐383B in relapsed/refractory multiple myeloma
Source: PubMed Central journal article supplement (PMC9175895; doi:10.1002/jha2.69), 2020-08-01

## SUPPLEMENTAL MATERIAL

**Table S1: Antibody used flow cytometry-based ex vivo BsAb antibody assay**

| <b>Marker</b> | <b>Channel</b> | <b>Clone</b>  | <b>Supplier</b> | <b>Cat #</b> |
|---------------|----------------|---------------|-----------------|--------------|
| CD38          | FITC           | Multi-Epitope | ALPCO           | 70-38F2      |
| CD269 (BCMA)  | PE             | 19F2          | Biolegend       | 357504       |
| CD45          | PE-CF594       | HI30          | BD Biosciences  | 562279       |
| 7-AAD         | PerCP-Cy5.5    | Kit           | BD Biosciences  | 559925       |
| CD8           | PE-Cy7         | RPA-T8        | BD Biosciences  | 557750       |
| Annexin V     | APC            | Kit           | BD Biosciences  | 550474       |
| CD3           | APC-C750       | UCTH-1        | ALPCO           | 70-3AC750    |
| CD138         | BV421          | MI15          | BD Biosciences  | 562935       |
| CD107a        | BV510          | H4A3          | BD Biosciences  | 563078       |

**Figure S1: Gating strategy for plasma cell and cytotoxic T cells.** Following (A) doublet & debris exclusion based on morphological features, (B) plasma cells were defined as CD38<sup>high</sup>/CD138<sup>high</sup>/CD45<sup>-/int</sup> and PC lysis was calculated for each treatment group as follow  $[\% \text{ lysis} = \frac{\text{Treated PC count} \times 100}{\text{Untreated PC counts}}]$ . (C) Cytotoxic T cells were defined as CD3<sup>+</sup>/CD8<sup>+</sup>/CD45<sup>high</sup> (C) and CTL distribution was calculated for each treatment group as follow  $[\% \text{ CTL} = \frac{\text{Treated CTL count} \times 100}{\text{Untreated CTL counts}}]$ .

**A** Doublet exclusion and debris exclusion gating strategy

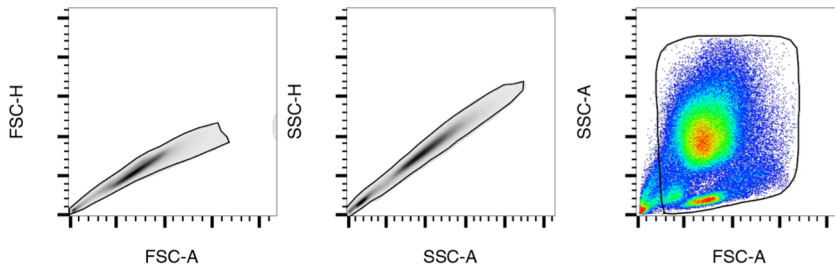

**B** Plasma cell gating strategy

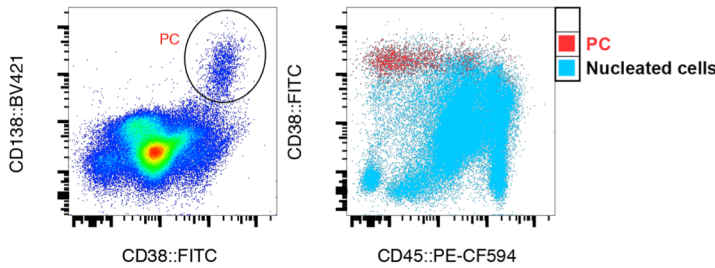

**C** Cytotoxic T cell gating strategy

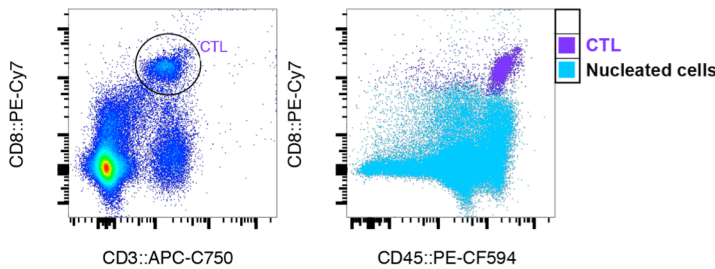

**Figure S2: Gating strategy for plasma cell and cytotoxic T cells phenotyping.**

**(A)** Gated from CD38<sup>high</sup>/CD138<sup>high</sup>/CD45<sup>-int</sup> population, live plasma cells were defined for each treatment group as 7-AAD<sup>-</sup> PC and dead apoptotic cells as 7-AAD<sup>+</sup>/Annexin V<sup>+</sup> PC. **(B)** Gated from CD38<sup>high</sup>/CD138<sup>high</sup>/CD45<sup>-int</sup> population, BCMA expression was expressed for each treatment group as average frequency of PC expressing BCMA (PC BCMA<sup>+</sup>) and mean fluorescence intensity (BCMA MFI). BCMA expression by T cells (defined as CD3<sup>+</sup>/CD45<sup>high</sup> population) was used as negative control. **(C)** Gated from CD3<sup>+</sup>/CD8<sup>+</sup>/CD45<sup>high</sup>, CTL degranulation was determined for each treatment group by calculating mean fluorescence intensity of CD107a.

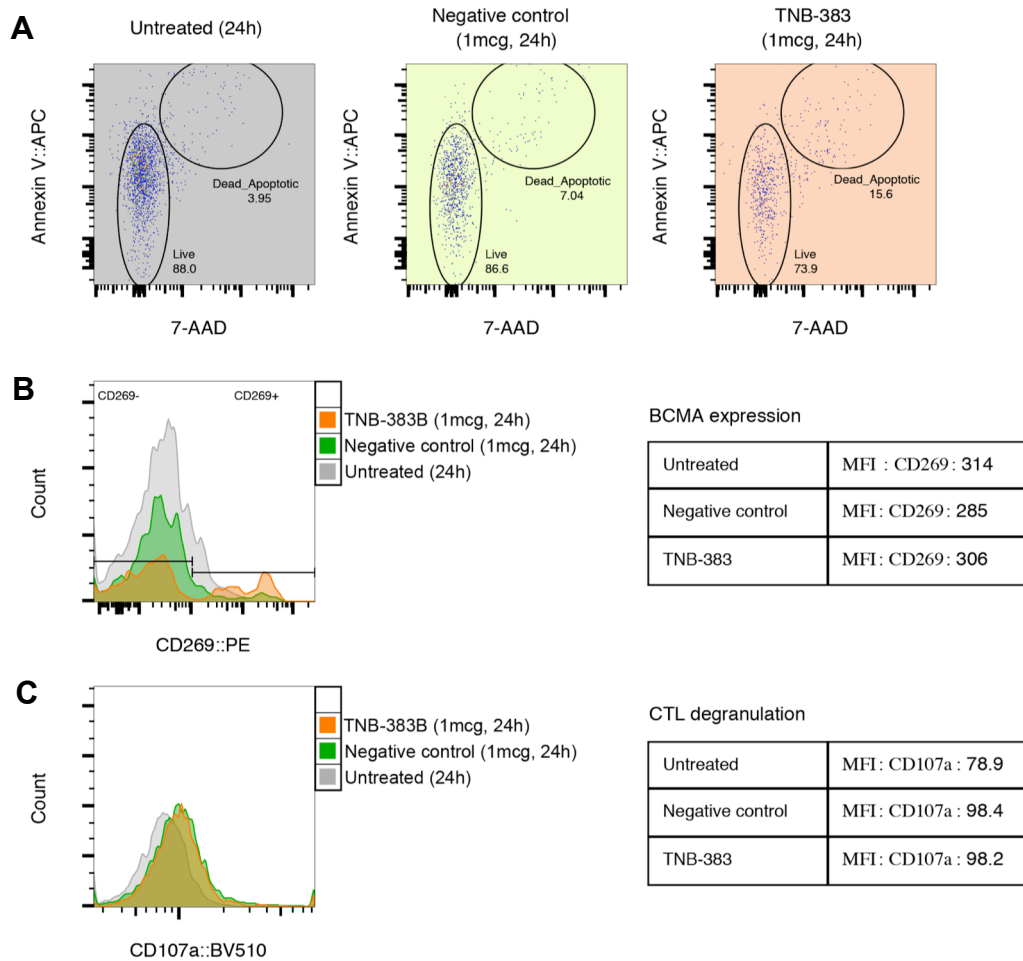

Supplement: JHA2-1-113-s001.pdf [file JHA2-1-113-s001.pdf]
